# Supplementary material for: Skin Microbiome Modulates the Effect of Ultraviolet Radiation on Cellular Response and Immune Function
Source: PubMed Central journal article supplement — iScience. 2019 Apr 26;15:211–22. doi: 10.1016/j.isci.2019.04.026 (PMC6515114; doi:10.1016/j.isci.2019.04.026), 2019-04-26
Supplement: mmc1.pdf [file mmc1.pdf]

**ISCI, Volume 15**

**Supplemental Information**

**Skin Microbiome Modulates the Effect  
of Ultraviolet Radiation on Cellular Response  
and Immune Function**

**VijayKumar Patra, Karin Wagner, Velmurugesan Arulampalam, and Peter Wolf**

## Supplemental Figures

- **Figure S1.** Representative images of quantitative analysis of neutrophilic microabscess and immunohistochemical stainings. Related to Figure 3.
- **Figure S2.** Minimal inflammatory dose (MID). Related to Figure 1.
- **Figure S3.** Biological process of differentially expressed genes in unexposed GF vs SPF skin. Related to Figure 4.

## Supplemental Tables

- **Table S1.** Differential expression of AMPs and other innate immune response genes in GF and SPF skin after UV-B irradiation. Related to Figure 6.
- **Table S2.** Canonical pathway analysis of UV-B-exposed GF skin using ingenuity pathway analysis. Related to Figure 4.
- **Table S3.** Canonical pathway analysis of UV-B-exposed SPF skin using ingenuity pathway analysis. Related to Figure 4.
- **Table S4.** Primer pairs used in the study. Related to Figure 6.

## Transparent Methods

## Supplemental References

**SPF UV+**

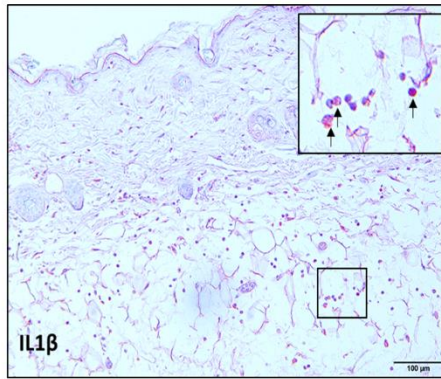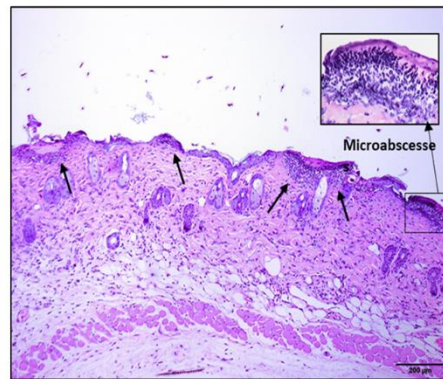

**GF UV+**

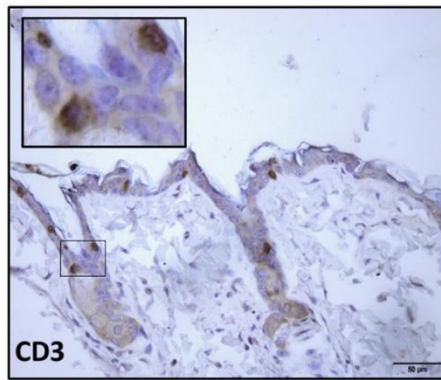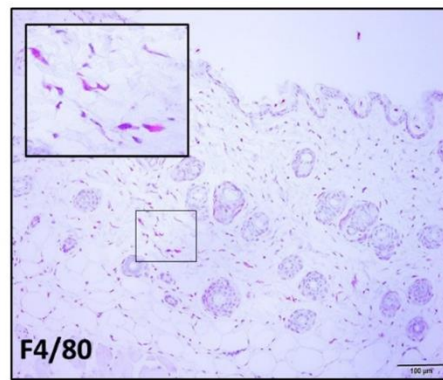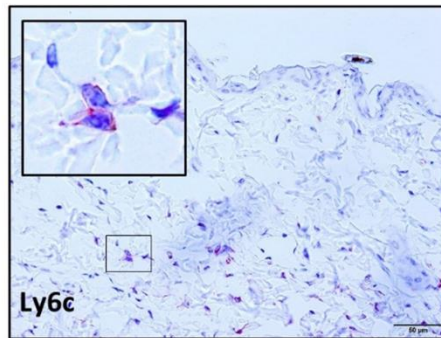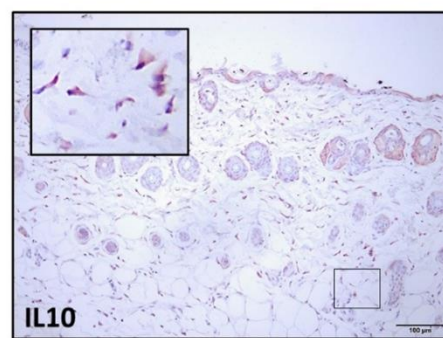

**Figure S1. Representative images of quantitative analysis of neutrophilic microabscess and immunohistochemical stainings. Related to Figure 3.**

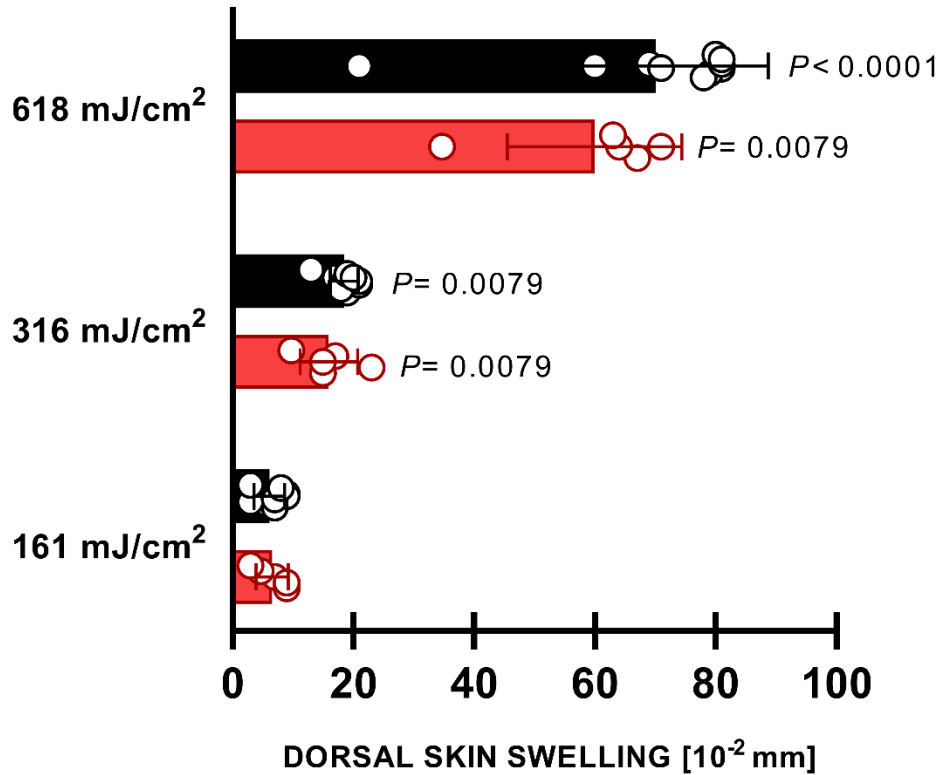

**Figure S2. Minimal inflammatory dose (MID). Related to Figure 1.** Data shown represent mean  $\pm$  SEM. N=5 for GF and N=10 for SPF group. Statistical analysis was performed for each dose vs 161 mJ/cm<sup>2</sup>. The minimum inflammatory dose was 316 mJ/cm<sup>2</sup>, as determined in a separate experiment in dose response studies (data not shown). No significance in skin swelling was observed between GF and SPF groups at any dose. *P*-value is determined by Mann-Whitney test.

REVIGO treemap of Biological Process GO terms enriched in differentially expressed genes in GF and SPF mice

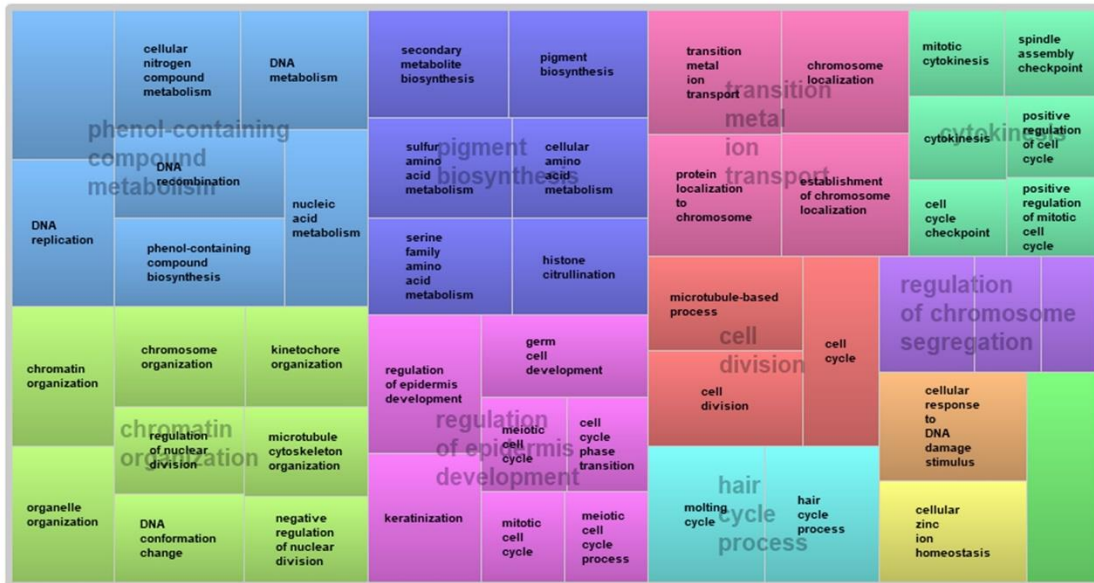

**Figure S3. Biological process of differentially expressed genes in unexposed GF vs SPF skin. Related to Figure 4.**

**Table S1. Differential expression of AMPs and other innate immune response genes in GF and SPF skin after UV-B irradiation. Related to Figure 6.**

| Gene                              | GF UV+ / GF UV- |               | SPF UV+ / SPF UV- |              |
|-----------------------------------|-----------------|---------------|-------------------|--------------|
|                                   | p-value         | Fold change   | p-value           | Fold change  |
| <i>Antimicrobial Peptides</i>     |                 |               |                   |              |
| <b>S100a7a</b>                    | 3.199E-06       | <b>-13.00</b> | 0.0192862         | <b>1.93</b>  |
| <b>S100a3</b>                     | 1.288E-06       | <b>-31.34</b> | 0.0426101         | <b>1.91</b>  |
| <b>S100a4</b>                     | 1.202E-07       | <b>4.12</b>   | 0.0019311         | <b>1.44</b>  |
| <b>S100a8</b>                     | 0.303135        | <b>1.39</b>   | 8.363E-05         | <b>9.01</b>  |
| <b>S100a9</b>                     | 0.0046878       | <b>2.65</b>   | 0.0001055         | <b>5.90</b>  |
| <b>Defb8</b>                      | 0.459292        | <b>-1.40</b>  | 0.0011003         | <b>-8.45</b> |
| <b>Defb3</b>                      | 0.0713878       | <b>1.31</b>   | 0.0005708         | <b>2.05</b>  |
| <b>Defb14</b>                     | 2.649E-05       | <b>4.81</b>   | 7.909E-06         | <b>6.36</b>  |
| <b>Defb6</b>                      | 0.0007831       | <b>2.14</b>   | 0.464353          | <b>-1.12</b> |
| <b>Defb14</b>                     | 2.649E-05       | <b>4.81</b>   | 7.909E-06         | <b>6.36</b>  |
| <b>Rnase1</b>                     | 0.0002004       | <b>2.20</b>   | 0.0862219         | <b>1.27</b>  |
| <b>Rnaset2b</b>                   | 1.404E-07       | <b>-2.42</b>  | 0.535204          | <b>-1.03</b> |
| <b>Rnaset2a</b>                   | 1.103E-07       | <b>-2.42</b>  | 0.419315          | <b>-1.04</b> |
| <b>Rnase1</b>                     | 0.0003325       | <b>-2.55</b>  | 0.0010736         | <b>-2.19</b> |
| <i>Toll-like receptors</i>        |                 |               |                   |              |
| <b>Tlr13</b>                      | 0.0282753       | <b>2.77</b>   | 0.0018269         | <b>5.72</b>  |
| <b>Tlr1</b>                       | 0.0646121       | <b>1.70</b>   | 0.0123469         | <b>2.22</b>  |
| <i>Serotonin signalling genes</i> |                 |               |                   |              |
| <b>Htr2a</b>                      | 0.0006754       | <b>2.05</b>   | 0.0725447         | <b>1.32</b>  |
| <b>SLC6A4</b>                     | 0.0028866       | <b>1.29</b>   | 2.125E-06         | <b>-2.05</b> |

**Table S2. Canonical pathway analysis of UV-B-exposed GF skin using ingenuity pathway analysis. Related to Figure 4.**

| <b>Ingenuity Canonical Pathways</b>                                          | <b>Total genes</b> | <b>p-value</b> | <b>z-score</b> |
|------------------------------------------------------------------------------|--------------------|----------------|----------------|
| TREM1 Signaling                                                              | 18/69              | 3.16E-06       | <b>4.24</b>    |
| Role of NFAT in Regulation of the Immune Response                            | 22/170             | 1.15E-02       | <b>3.57</b>    |
| PI3K Signaling in B Lymphocytes                                              | 16/124             | 2.88E-02       | <b>3.5</b>     |
| Dendritic Cell Maturation                                                    | 27/159             | 7.94E-05       | <b>3.4</b>     |
| Leukocyte Extravasation Signaling                                            | 23/202             | 3.80E-02       | <b>3.27</b>    |
| IL-6 Signaling                                                               | 24/124             | 2.24E-05       | <b>3.12</b>    |
| Fcγ3 Receptor-mediated Phagocytosis in Macrophages and Monocytes             | 13/90              | 2.00E-02       | <b>3.05</b>    |
| NF-κB Signaling                                                              | 25/168             | 1.10E-03       | <b>3.00</b>    |
| CD28 Signaling in T Helper Cells                                             | 18/118             | 3.98E-03       | <b>3.00</b>    |
| Toll-like Receptor Signaling                                                 | 13/70              | 2.40E-03       | <b>2.71</b>    |
| iCOS-iCOSL Signaling in T Helper Cells                                       | 18/110             | 1.82E-03       | <b>2.66</b>    |
| PKCδ Signaling in T Lymphocytes                                              | 17/120             | 1.05E-02       | <b>2.66</b>    |
| Retinoic acid Mediated Apoptosis Signaling                                   | 8/43               | 1.55E-02       | <b>2.64</b>    |
| Acute Phase Response Signaling                                               | 25/157             | 3.98E-04       | <b>2.55</b>    |
| Actin Cytoskeleton Signaling                                                 | 24/217             | 4.68E-02       | <b>2.50</b>    |
| Role of Pattern Recognition Receptors in Recognition of Bacteria and Viruses | 20/127             | 1.66E-03       | <b>2.49</b>    |
| UVA-Induced MAPK Signaling                                                   | 14/99              | 1.95E-02       | <b>2.49</b>    |
| Interferon Signaling                                                         | 6/30               | 2.45E-02       | <b>2.44</b>    |
| Oncostatin M Signaling                                                       | 6/33               | 3.80E-02       | <b>2.44</b>    |
| NF-κB Activation by Viruses                                                  | 13/86              | 1.41E-02       | <b>2.30</b>    |
| Death Receptor Signaling                                                     | 17/88              | 3.47E-04       | <b>2.18</b>    |
| Role of IL-17F in Allergic Inflammatory Airway Diseases                      | 9/37               | 1.62E-03       | <b>2.12</b>    |
| PCP pathway                                                                  | 8/62               | 0.04677        | <b>-2.12</b>   |
| Basal Cell Carcinoma Signaling                                               | 12/69              | 0.00603        | <b>-2.64</b>   |
| PPAR Signaling                                                               | 18/89              | 0.00013        | <b>-3.30</b>   |
| LXR/RXR Activation                                                           | 19/108             | 0.00055        | <b>-3.63</b>   |

**Table S3. Canonical pathway analysis of UV-B-exposed SPF skin using ingenuity pathway analysis. Related to Figure 4.**

| <b>Ingenuity Canonical Pathways</b>          | <b>Total genes</b> | <b>p-value</b> | <b>z-score</b> |
|----------------------------------------------|--------------------|----------------|----------------|
| Acute Phase Response Signaling               | 21/157             | 1.6218E-07     | <b>3.15</b>    |
| TREM1 Signaling                              | 12/69              | 4.7863E-06     | <b>2.88</b>    |
| LPS/IL-1 Mediated Inhibition of RXR Function | 21/197             | 6.9183E-06     | <b>2.33</b>    |
| Toll-like Receptor Signaling                 | 12/70              | 5.6234E-06     | <b>2.12</b>    |
| Cholecystokinin/Gastrin-mediated Signaling   | 8/97               | 0.02137962     | <b>2.12</b>    |
| Inflammasome pathway                         | 4/19               | 0.00389045     | <b>2.00</b>    |
| Oncostatin M Signaling                       | 4/33               | 0.02818383     | <b>2.00</b>    |
| MIF Regulation of Innate Immunity            | 4/38               | 0.04466836     | <b>2.00</b>    |
| LXR/RXR Activation                           | 19/108             | 6.9183E-09     | <b>-2.66</b>   |
| PPAR Signaling                               | 10/89              | 0.0011749      | <b>-3.16</b>   |



**Table S4. Primer pairs used in the study. Related to Figure 6.**

| <b>Gene</b> | <b>Sequence (5'-&gt;3')</b>                                 |
|-------------|-------------------------------------------------------------|
| IL1F8       | ACAAAAAGCCTTTCTGTTCTATCAT<br>CCATGTTGGATTTACTTCTCAGACT      |
| IL1F9       | AGAGTAACCCCAGTCAGCGTG<br>AGGGTGGTGGTACAAATCCAA              |
| IL1 $\beta$ | CAG GCA GGC AGT ATC ACT CA<br>AGG TGC TCA TGT CCT CAT CC    |
| IL4RA       | TGACCTACAAGGAACCCAGGC<br>CTCGGCGCACTGACCCATCT               |
| IL6         | TGAACAACGATGATGCACTTGCAGA<br>TCTGTATCTCTCTGAAGGACTCTGGCT    |
| IL10        | CCA AGC CTT ATC GGA AAT GA<br>CCA AGC CTT ATC GGA AAT GA    |
| IL10RA      | CCCATTCTCGTACGATCT<br>TTTCCAGTGGAGGATGTGCT                  |
| IL16        | AACCGAGGACAGGAACCACT<br>CTTGAGAGATTTGCCATTGA                |
| IL18RAP     | TGCAATGAAGCGGCATCTGT<br>CCGGTGATTCTGTTTCAGGCT               |
| IL20RA      | AAGTCGAGAAGAACGTGGTC<br>GGGTGTTTTTCCTTGCCAAC                |
| IL20RB      | AATGCTCACCGACCAAAAGT<br>AGGACAGTTGCATTTTCGGTT               |
| IL31RA      | TTCAAGACATTGTCAATCAGTGTG<br>GTCAGTGTGTTGATGCTAAGTAGAAGA     |
| IL33        | GAT GGG AAG AAG CTG ATG GTG<br>TTG TGA AGG ACG AAG AAG GC-3 |
| IL34        | ACTCAGAGTGGCCAACATCACAAAG<br>ATTGAGACTCACCAAGACCCACAG       |
| CXCL2       | AGGGCGGTCAAAAAGTTTGC<br>CGAGGCACATCAGGTACGAT                |
| CXCL16      | AAA CAT TTG CCT CAA GCC AGT<br>GTT TCT CAT TTG CCT CAG CCT  |
| CCL2        | TTAAAAACCTGGATCGGAACCAA<br>GCATTAGCTTCAGATTTACGGGT          |
| CCL3        | ACTGCCTGCTGCTTCTCCTACA                                      |

|                            |                                                             |
|----------------------------|-------------------------------------------------------------|
|                            | AGGAAAATGACACCTGGCTGG                                       |
| CCR1                       | TTAGCTTCCATGCCTGCCTTATA<br>TCCACTGCTTCAGGCTCTTGT            |
| CXCR2                      | CAC CGA TGT CTA CCT GCT GA<br>CAC AGG GTT GAG CCA AAA GT    |
| CCL12                      | GTCCTCAGGTATTGGCTGGA<br>GGGTCAGCACAGATCTCCTT                |
| S100A3                     | GTGAGTTCCGGGAGTGTGAC<br>TGGCAGTAGAGACAGAGGCT                |
| S100A4                     | GCTGCCAGATAAGGAACCC<br>TGCGAAGAAGCCAGAGTAAGG                |
| S100A8                     | AAATCACCATGCCCTCTACAAG<br>CCCACCTTTTATCACCATCGCAA           |
| S100A9                     | GTTGATCTTTGCCTGTCATGAG<br>AGCCATTCCCTTTAGACTTGG             |
| S100A10                    | CGCCCTCTGTACCCGCC<br>CAGCCAGAGGGTCCTTTT GA                  |
| DEFB6                      | TGGTGATGCTGTCTCCACTT<br>CATGAACGCTGGCATGAG                  |
| DEFB14                     | GTA TTC CTC ATC TTG TTC TTG G<br>AAG TAC AGC ACA CCG GCC AC |
| NE                         | CTTTGAGAACGGCTTTGA CC<br>CACATTGAGCTCTTGGAG CA              |
| <b>House keeping genes</b> |                                                             |
| 18s                        | CCTGCGGCTTAATTTGACTC<br>AACTAAGAACGGCCATGCAC                |
| Ywhaz                      | AACAGCTTTTCGATGAAGCCAT<br>TGGGTATCCGATGTCCACA               |

## Transparent Methods

### Animals

Cesarean-born, axenic 4-8 weeks old female C57BL/6 mice were derived at the Core Facility for Germfree Research (CFGR) at Karolinska Institutet, Stockholm; housed and bred in a sterile environment, and regularly monitored to ensure their germ-free status. All short-term experiments with axenic mice were conducted in ISOcage positive cages from Tecniplast, using the appropriate standard operating procedures (SOPs) at CFGR, Karolinska Institutet. Protocols involving the use of germ-free animals were approved by the Regional Animal Research Ethical Board, Stockholm, Sweden (Stockholms norra djurförsöksetiska nämnd), following proceedings described in EU legislation (Council Directive 86/609/EEC). Animal husbandry was done in accordance with Karolinska Institutet guidelines and approved by the above-mentioned board (Ref: N190/15). All animal care and treatment protocols were also approved by the Austrian Federal Ministry for Science and Research, through protocol number BMWFW-66.010/0137-WF/V/3b/2014. Animal experiments adhered to 3R (replacement, reduction, and refinement) policy to ensure the use of minimum numbers of animals to maximize data mining.

### UV-B source and irradiation

The backs of the mice were shaved using an electric clipper 24 hours before UV-B exposure. UV radiation was performed using a Waldmann 236 light source (Waldmann Medizintechnik, Villingen-Schwenningen, Germany), equipped with two Waldmann UV6 fluorescent tubes (emission range 280–360 nm; peak, 320 nm) and positioned upside down on top of the cage. The mean UVB irradiance of the lamp was 1.9 mW/cm<sup>2</sup>, as measured by a Waldmann UV photometer with a UV6 detector head appropriate to the radiation device. Each mouse in the CHS experiments was administered a UV-B radiation dose of 618 mJ/cm<sup>2</sup>, being equal to 2 (minimal inflammatory doses) MID (Fig. S2) (average time of exposure 5 min, 42 sec). During the UV exposure, ears of all the mice in CHS experiments were shielded by covering with black electric tape. All the procedures were performed under sterile conditions in a laminar air flow unit.

### Minimal inflammatory dose (MID)

To determine the effects of the minimal inflammatory dose (Schweintzger et al., 2015; Wolf et al., 1993) and multiples of it, 5 GF and 10 SPF mice were irradiated on the shaved dorsal skin and macroscopic skin thickness was measured immediately before and 24 hrs after UV exposure by spring-loaded engineer's micrometer and skin swelling was calculated.

### Contact hypersensitivity assay

Groups of mice were sensitized (3 days after UV exposure) by applying 50 µl of freshly prepared 0.5% 1-fluoro-2,4-dinitrobenzene (DNFB; Sigma #D1529) in acetone to the shaved abdomen (Fig 1A). Five days later, the ears were challenged with 20 µl of freshly prepared 0.25% DNFB in acetone. Ear thickness before and 24 hours after the challenge was measured using a spring-loaded engineer's micrometer (Mitutoyo) to calculate ear swelling, and the following formula was used for calculating percent suppression of CHS:

$$CHS = \left[ 1 - \left( \frac{\text{Ear swelling of UV+ sensitized+mice}}{\text{Ear swelling of UV- sensitized+mice}} \right) * 100 \right].$$

### Skin sample collection

Mice were sacrificed 24 hours after UV exposure (Fig 2A) and skin samples were then collected, fixed in 4% formaldehyde, and paraffin-embedded for histological and immunohistochemical analysis. Parts of the skin samples were snap frozen in liquid nitrogen and stored at -80° C until RNA isolation.

### RNA extraction, microarray, and data analysis

Total RNA was extracted from the whole skin on the same location on the dorsal skin across all the mice. RNA was extracted using the miRNeasy Kit (Qiagen, Hilden, Germany; Cat. No. 217004) including DNase treatment steps on the column according to the protocol. We obtained RNA quality of a RIN between 5 and 6 (checked on the BioAnalyzer BA2100 (Agilent; Foster City, CA; Cat.No. 5065-4476)). GeneChip® Mouse Gene 2.0 ST Arrays (Affymetrix; Santa Clara, CA; Cat No. 902118) were used for the whole transcript with 500 ng of the total RNA as input. The protocol was followed according to the manual. The amplified cDNA was analyzed using the BioAnalyzer BA2100 (Agilent, Foster City,

CA) and RNA 6000 Nano LabChip (Agilent; Foster City, CA; Cat.No. 5065-4476). The given fragment size of < 2000 nt over all samples was satisfactory for ss-cDNA synthesis, fragmentation, and labeling according to the manual. We hybridized 18 hours at 45°C as suggested in the manual while rotating in the hybridization oven. Washing and staining (GeneChip® HT hybridization, Wash, and Stain Kit; Affymetrix, Santa Clara, CA; Cat No. 900720) were done with the Affymetrix Genechip® Fluidics Station 450 according to the manual (protocol on Fluidics Station: FS450\_0002). Arrays were then scanned with the Affymetrix GeneChip scanner GCS3000. For evaluation of the hybridization controls and pre-analysis, Affymetrix Expression Console software version 1.3.1. was used. Raw data are available at the Gene Expression Omnibus (GEO; accession number GSE117359). Heat maps were constructed using heat mapper (<http://www.heatmapper.ca/>) (Babicki et al., 2016). We used the online tool GeneMANIA (<https://genemania.org/>) (Warde-Farley et al., 2010) to predict the interactions and functional association of the upstream regulator genes. Statistical analysis was done using Partek Software v.6.6 (Partek Inc, St Louis, MO). CEL files with the probe intensity data are imported using the robust multi-chip average (RMA) algorithm. This included background correction, quantile normalization across all arrays, and median polished summarization based on log-transformed expression values.

### **cDNA synthesis and qPCR**

Total RNA (1 µg) extracted for microarray analysis was used to prepare cDNA using the Script cDNA synthesis kit (#1708890; Bio-Rad Laboratories). Reverse transcription (RT) was then performed on the 1 µl RNA sample by adding iScript reagents including 4 µl 5x iScript reaction mix, 1 µl iScript reverse transcriptase, and nuclease-free water to a reaction volume of 20 µl. The reaction was incubated for priming at 25°C for 5 min, RT at 42°C for 30 min, and RT inactivation at 85°C for 5 min. cDNA diluted 1:5 was used for qPCR. PCR was performed in 384-well Hard-Shell® PCR plates (#HSP3805, Bio-Rad Laboratories) using 1 µl of cDNA, 5 µl of iTaq™ universal SYBR® Green Supermix (#1725121, Bio-Rad Laboratories), 1 µl 10 pM forward primer, 1 µl 10 pM reverse primer, and sufficient nuclease-free water to reach a total reaction volume of 10 µl. mRNA was then quantified using quantitative PCR on a CFX384 Touch Real-Time PCR Detection System (Bio-Rad Laboratories). Primer pairs used are listed in Table S4. Expression of mRNA was analyzed using the change-in-cycle-threshold ( $\Delta\Delta CT$ ) method.

### **Histological analysis**

Paraffin-embedded skin samples were sectioned (3.5 µm) and stained with hematoxylin and eosin (H&E). Cellular infiltrate in the dermis was quantified using an ocular grid with area coverage of 0.25 mm<sup>2</sup> at 5 randomly selected sites per sample. Epidermal thickness and epidermal layers were determined at 5 randomly selected locations per H&E sample under a microscope at 40x magnification. Sunburn cells (as defined as cells having pyknotic nucleus and eosinophilic cytoplasm) were counted in interfollicular epidermis in at least 10 random fields at a magnification of 10x. All measurements were performed in blinded fashion. Finally, the results were averaged per mouse and per treatment group for the statistical analysis. Images of stainings were acquired with a DP71 digital camera (Olympus, Vienna, Austria), attached to an Olympus BX51 microscope.

### **Immunohistochemistry**

FFPE tissue sections (3.5 µm) were deparaffinized and rehydrated for immunohistochemical staining. Slides with tissues sections were incubated for heat-induced antigen retrieval in Dako Target Retrieval Solution Citrate pH 6.0 (Dako S2369) or Dako Target Retrieval Solution pH 9.0 (Dako S2367) for 30 min in a steamer. The staining was then performed manually at 4°C by antibody incubation using the Dako REAL™ Detection System, Peroxidase/AEC, and antibodies directed against anti-CD3 (1:200; #ab16669, Abcam, Cambridge), anti-Ly6c (1:500, ab15627, Abcam, Cambridge), anti-IL1 beta (1:200, ab9722, Abcam, Cambridge) and anti-IL10 (1:400, ab189392, Abcam, Cambridge). The ImmPRESS™ HRP Anti-Rat IgG (Peroxidase) Polymer Detection Kit (MP-7444, Vector Laboratories, Burlingame, California, USA) was used as secondary antibody for anti-Ly6c and anti-IL10 antibodies. F4/80 (1:200, MA5-16630, Thermo Scientific) staining was performed using EXPOSE mouse- and rabbit-specific HRP detection IHC kits (ab80436, Abcam, Cambridge) according to the manufacturer's instructions. Images of stainings were acquired with a DP71 digital camera (Olympus, Vienna, Austria), attached to an Olympus BX51 microscope.

**Statistical analysis**

The Mann-Whitney test was used to determine statistical significance between groups in CHS experiments and histological analyses. For microarray analyses, 1-way ANOVA with FDR < 5% was used for filtering genes. Differentially expressed genes were filtered when  $P < 0.05$  and fold change was  $\pm 2$ . An unpaired T-test was used to determine statistical significance for qPCR analysis. 2-Way ANOVA was used to determine statistical significance for immunohistochemical quantitative analysis. The statistical analysis was performed using GraphPad Prism version 8 (GraphPad). Statistical significance was set at  $P < 0.05$ .

### Supplemental References:

Babicki, S., Arndt, D., Marcu, A., Liang, Y., Grant, J.R., Maciejewski, A., and Wishart, D.S. (2016). Heatmapper: web-enabled heat mapping for all. *Nucleic Acids Res* 44, W147-153.

Schweintzger, N.A., Bambach, I., Reginato, E., Mayer, G., Limon-Flores, A.Y., Ullrich, S.E., Byrne, S.N., and Wolf, P. (2015). Mast cells are required for phototolerance induction and scratching abatement. *Exp Dermatol* 24, 491-496.

Warde-Farley, D., Donaldson, S.L., Comes, O., Zuberi, K., Badrawi, R., Chao, P., Franz, M., Grouios, C., Kazi, F., Lopes, C.T., *et al.* (2010). The GeneMANIA prediction server: biological network integration for gene prioritization and predicting gene function. *Nucleic Acids Res* 38, W214-220.

Wolf, P., Yarosh, D.B., and Kripke, M.L. (1993). Effects of sunscreens and a DNA excision repair enzyme on ultraviolet radiation-induced inflammation, immune suppression, and cyclobutane pyrimidine dimer formation in mice. *J Invest Dermatol* 101, 523-527.
